# Supplementary material for: Chronic kidney disease care delivered by US family medicine and internal medicine trainees: results from an online survey
Source: PubMed Central journal article supplement (PMC1713248; doi:10.1186/1741-7015-4-30), 2006-12-12
Supplement: 1741-7015-4-30-S1.pdf [file 1741-7015-4-30-S1.pdf]

## Design Survey Show All Pages and Questions

[<< Back](#) [Preview](#)

To change the **look** of your survey, select a choice below. Click 'Add' to create your own custom theme.

Theme: Nephrology [Add](#) [Edit](#) [Delete](#)

### Division of Nephrology - Chronic Kidney Disease Survey [Edit Title](#) [Edit Numbering](#) [Edit Logo](#)

[Add Page](#)

#### 1. Begin the survey. [Edit Page](#) [Delete Page](#) [Copy/Move](#) [Add Logic](#)

[Add Question](#) [Add Page](#)

[Edit](#) [Delete](#) [Copy/Move](#)

**This survey is designed to detect practice patterns; it does not seek right or wrong answers. Please answer all questions according to what you do in your everyday clinical practice.**

**All answers are recorded in an anonymous fashion.**

**Please click on "next" to start the survey.**

[Add Question](#) [Add Page](#)

#### 2. page 2 [Edit Page](#) [Delete Page](#) [Copy/Move](#) [Edit Logic](#)

Progress: ■□□□□□□□□□

[Add Question](#) [Add Page](#)

[Edit](#) [Delete](#) [Copy/Move](#) [Add Logic](#)

**\* Professional Title**

- Medical Student
- Physician
- Nurse Practitioner
- Physician Assistant
- Other (please specify)

[Add Question](#) [Add Page](#)

#### 3. Subspecialty [Edit Page](#) [Delete Page](#) [Copy/Move](#) [Edit Logic](#)

Progress: ■□□□□□□□□□

[Add Question](#) [Add Page](#)

\* **Subspecialty (choose field of major activity)**

- Cardiology
- Clinical Pharmacology
- Endocrinology/Diabetes/Metabolism
- Gastroenterology
- General Internal Medicine
- Gerontology & Geriatric Medicine
- Hematology/Oncology
- Infectious Diseases
- Laboratory Medicine
- Nephrology & Hypertension
- Pulmonary & Critical Care
- Rheumatology & Immunology
- Other (please specify)

**4. Specialty** Edit Page Delete Page Copy/Move Add Logic

Progress: ■□□□□□□□□□

\* **Primary Specialty**

- Anesthesiology
- Dermatology
- Family Medicine
- Internal Medicine & Subspecialties
- Neurological Surgery
- Neurology
- Obstetrics & Gynecology
- Ophthalmology
- Orthopaedics and Rehabilitation
- Otolaryngology
- Pathology
- Pediatrics
- Physical Therapy
- Psychiatry
- Radiation Oncology
- Radiology
- Rehabilitaion Medicine
- Surgery
- Other (please specify)

## 5. Practice type Edit Page Delete Page Copy/Move Add Logic

Progress: ■■□□□□□□□□

Add Question

Add Page

Edit Delete Copy/Move Add Logic

### \* Practice type

- Not seeing patients
- Academic
- Non-academic solo practice
- Non-academic single-specialty group practice
- Non-academic multi-specialty group practice

Add Question

Add Page

Edit Delete Copy/Move Add Logic

### \* ZIP code of primary practice site (choose only one):

- 99999 - no practice
- 33136 - JMH, VAMC, UMHC/Sylvester
- Other (please specify)

Add Question

Add Page

## 6. Survey Edit Page Delete Page Copy/Move Add Logic

Progress: ■■□□□□□□□□

Add Question

Add Page

Edit Delete Copy/Move Add Logic

### \* How many patients do you see per week?

Use an average if you are not seeing patients every week.

- less than 15
- 15-25
- 26-50
- 51-100
- 101-150
- more than 150

Add Question

Add Page

Edit Delete Copy/Move Add Logic

### \* How many patients in your practice have any degree of kidney failure?

Include patients with normal creatinine clearance and evidence of kidney damage such as microalbuminuria, proteinuria, or hematuria.

- none
- 1-10%
- 11-30%
- 31-50%

- 51-70%
- >70%

[Add Question](#) [Add Page](#)

**7. Survey2** [Edit Page](#) [Delete Page](#) [Copy/Move](#) [Add Logic](#)

Progress: ■■■□□□□□□□□

[Add Question](#) [Add Page](#)

[Edit](#) [Delete](#) [Copy/Move](#) [Add Logic](#)

**\* In your opinion, what is the best measure of kidney function?**

Choose only one answer.

- 24-hour urine collection for creatinine clearance
- Renogram with lasix
- Renal ultrasound
- 24-hour urine collection for urea clearance
- BUN
- Estimated glomerular filtration rate (GFR) using a mathematical formula
- Serum creatinine

[Add Question](#) [Add Page](#)

**8. Survey3** [Edit Page](#) [Delete Page](#) [Copy/Move](#) [Add Logic](#)

Progress: ■■■□□□□□□□□

[Add Question](#) [Add Page](#)

[Edit](#) [Delete](#) [Copy/Move](#)

**\* In your opinion, how do the following factors influence the risk for developing chronic kidney disease?**

|                                    | No influence                     | Minimally increased   | Highly increased      |
|------------------------------------|----------------------------------|-----------------------|-----------------------|
| Cigarette smoking                  | <input checked="" type="radio"/> | <input type="radio"/> | <input type="radio"/> |
| Recurrent urinary tract infections | <input type="radio"/>            | <input type="radio"/> | <input type="radio"/> |
| Age above 65 years                 | <input checked="" type="radio"/> | <input type="radio"/> | <input type="radio"/> |
| Kidney stones                      | <input type="radio"/>            | <input type="radio"/> | <input type="radio"/> |
| Lower urinary tract obstruction    | <input checked="" type="radio"/> | <input type="radio"/> | <input type="radio"/> |
| Recovery from acute renal failure  | <input type="radio"/>            | <input type="radio"/> | <input type="radio"/> |
| Chronic heart failure              | <input checked="" type="radio"/> | <input type="radio"/> | <input type="radio"/> |
| Body mass index between 18 and 22  | <input type="radio"/>            | <input type="radio"/> | <input type="radio"/> |
| African American race              | <input checked="" type="radio"/> | <input type="radio"/> | <input type="radio"/> |
| Hispanic ethnicity                 | <input type="radio"/>            | <input type="radio"/> | <input type="radio"/> |
| Family history of kidney failure   | <input checked="" type="radio"/> | <input type="radio"/> | <input type="radio"/> |
| Autoimmune diseases                | <input type="radio"/>            | <input type="radio"/> | <input type="radio"/> |

Hypertension

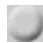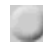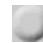

Diabetes

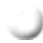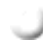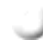

Add Question

Add Page

## 9. Survey4

Edit Page

Delete Page

Copy/Move

Add Logic

Progress: ■■■■□□□□□□

Add Question

Add Page

Edit Delete Copy/Move Add Logic

\* What is your blood pressure goal for a patient with a creatinine clearance of 40 ml/min?

- less than 140/90
- less than 130/90
- less than 130/80
- less than 125/75
- less than 120/70
- I don't know

Add Question

Add Page

## 10. Survey4b

Edit Page

Delete Page

Copy/Move

Add Logic

Progress: ■■■■□□□□□□

Add Question

Add Page

Edit Delete Copy/Move Add Logic

\* In a patient with mild to moderate chronic kidney disease, which of the following do you consider first-line antihypertensive agents to slow the progression of kidney disease?

Check all that apply.

- Alpha blockers
- Non-dihydropyridine calcium channel blockers
- Angiotensin receptor blockers
- Angiotensin converting enzyme inhibitors
- Thiazide diuretics
- Loop diuretics
- Dihydropyridine calcium channel blockers
- Beta blockers
- Other (please specify)

Add Question

Add Page

## 11. Survey6

Edit Page

Delete Page

Copy/Move

Add Logic

Progress: ■■■■□□□□□□

Add Question

Add Page

\* You see a 55-year old African American woman with type 2 diabetes and hypertension. Her medications are insulin and a thiazide diuretic. Her blood pressure is well controlled, and she has no complaints. Her serum creatinine has increased to 2 mg/dl over the past two years.

Which of the following laboratory tests would you order in a patient like this?

- Lipid panel
- Random (spot) urine sample for microalbumin
- Random (spot) urine sample for creatinine
- CBC
- Liver function panel
- Serum calcium
- Urine analysis
- Serum phosphate
- Intact PTH
- Glycohemoglobin (HbA1c)
- Serum albumin
- Random (spot) urine sample for electrolytes
- 24-hour urine collection for protein
- 24-hour urine collection for creatinine

12. Survey5 Edit Page Delete Page Copy/Move Add Logic

Progress: ■■■■□□□□□□

\* Which of the following conditions may be a consequence of chronic kidney disease?

Check all that apply.

- Anemia
- Metabolic acidosis
- Respiratory acidosis
- Secondary hyperparathyroidism
- Worsening hypertension
- Increased serum potassium
- Dyslipidemia
- Malnutrition
- Volume overload
- Hirsutism
- Obesity

13. Survey 6aa Edit Page Delete Page Copy/Move Add Logic

Progress: ■■■■■■□□□□□□

Add Question Add Page

Edit Delete Copy/Move

**\* At what level of creatinine clearance (or glomerular filtration rate) do you currently screen your patient for each of the following conditions?**

|                               | below 90<br>ml/min    | below 60<br>ml/min    | below 30<br>ml/min    | below 15<br>ml/min    | I do not<br>screen    |
|-------------------------------|-----------------------|-----------------------|-----------------------|-----------------------|-----------------------|
| Metabolic acidosis            | <input type="radio"/> | <input type="radio"/> | <input type="radio"/> | <input type="radio"/> | <input type="radio"/> |
| Anemia                        | <input type="radio"/> | <input type="radio"/> | <input type="radio"/> | <input type="radio"/> | <input type="radio"/> |
| Malnutrition                  | <input type="radio"/> | <input type="radio"/> | <input type="radio"/> | <input type="radio"/> | <input type="radio"/> |
| Secondary hyperparathyroidism | <input type="radio"/> | <input type="radio"/> | <input type="radio"/> | <input type="radio"/> | <input type="radio"/> |

Add Question Add Page

#### 14. Survey 6b

Edit Page Delete Page Copy/Move Add Logic

Progress: ■■■■■■□□□□□□

Add Question Add Page

Edit Delete Copy/Move Add Logic

**\* At what hemoglobin concentration would you intervene (start treatment or request a consult) in a patient with a creatinine clearance of 40 ml/min and anemia of chronic disease?**

- Hgb below 8 g/dl
- Hgb below 9 g/dl
- Hgb below 10 g/dl
- Hgb below 11 g/dl
- Hgb below 12 g/dl
- Hgb below 13 g/dl

Add Question Add Page

#### 15. Survey 6ba

Edit Page Delete Page Copy/Move Add Logic

Progress: ■■■■■■□□□□□□

Add Question Add Page

Edit Delete Copy/Move Add Logic

**\* At what intact PTH concentration would you intervene (start treatment or request a consult) in a patient with a creatinine clearance of 40 ml/min and secondary hyperparathyroidism?**

- intact PTH above 30 pg/ml
- intact PTH above 50 pg/ml
- intact PTH above 70 pg/ml
- intact PTH above 110 pg/ml
- intact PTH above 150 pg/ml

I do not know

Add Question

Add Page

## 16. Survey 6c

Edit Page

Delete Page

Copy/Move

Add Logic

Progress: ■■■■■■■■□□□□

Add Question

Add Page

Edit Delete Copy/Move

Your patient is a 40-year old woman with hypertension. She has the following laboratory data:

|                      |            |                  |
|----------------------|------------|------------------|
| Creatinine clearance | 40 ml/min  | (normal:90-140)  |
| Hgb:                 | 8.0 g/dl   | (normal:12-16)   |
| Iron:                | 40 mcg/dl  | (normal:65-165)  |
| TIBC:                | 400 mcg/dl | (normal:300-450) |
| Ferritin:            | 40 ng/ml   | (normal:20-300)  |

Add Question

Add Page

Edit Delete Copy/Move Add Logic

\* What medications, if any, would you use to treat this patient's anemia (check all that apply)?

- Oral iron
- Intravenous iron
- Erythropoietin or darbapoietin
- No medications
- Other (please specify)

Add Question

Add Page

Edit Delete Copy/Move Add Logic

\* What consultations, if any, would you request?

- Nephrology consult
- Hematology consult
- No consultation
- Other (please specify)

Add Question

Add Page

## 17. Survey 6d

Edit Page

Delete Page

Copy/Move

Add Logic

Progress: ■■■■■■■■□□□□

Add Question

Add Page

Edit Delete Copy/Move

Your patient is a 40-year old woman with hypertension. She has the following laboratory



**data:**

|                      |           |                   |
|----------------------|-----------|-------------------|
| Creatinine clearance | 40 ml/min | (normal:90-140)   |
| Calcium:             | 8.5 mg/dl | (normal:8.5-10.5) |
| Phosphate:           | 2.9 mg/dl | (normal:2.0-4.3)  |
| PTH (intact):        | 120 pg/ml | (normal:10-55)    |
| 25-OH Vitamin D:     | 40 ng/ml  | (normal:20-56)    |

[Add Question](#) [Add Page](#)

[Edit](#) [Delete](#) [Copy/Move](#) [Add Logic](#)

**\* What medications, if any, would you use to treat this patient's elevated PTH?**

- Calcium supplementation
- Phosphate binder
- 1,25-Vitamin D (calcitriol, paricalcitol, or doxercalciferol)
- 25-Vitamin D (ergocalciferol)
- No Medication
- Other (please specify)

[Add Question](#) [Add Page](#)

[Edit](#) [Delete](#) [Copy/Move](#) [Add Logic](#)

**\* What consultations, if any, would you request?**

- Nephrology consultation
- Endocrinology consultation
- No consultation
- Other (please specify)

[Add Question](#) [Add Page](#)

**18. Survey7** [Edit Page](#) [Delete Page](#) [Copy/Move](#) [Add Logic](#)

Progress: ■■■■■■■■■■□□□

[Add Question](#) [Add Page](#)

[Edit](#) [Delete](#) [Copy/Move](#) [Add Logic](#)

**\* In your opinion, if a patient with a creatinine clearance of 40 ml/min develops secondary hyperparathyroidism, what combination of serum calcium, serum phosphate, and PTH concentrations is most likely?**

- Low calcium, normal phosphate, high PTH
- High calcium, low phosphate, high PTH
- Low calcium, high phosphate, high PTH
- Low calcium, high phosphate, normal PTH
- Normal calcium, normal phosphate, high PTH
- Other (please specify)

[Add Question](#) [Add Page](#)

**19. Survey8** [Edit Page](#) [Delete Page](#) [Copy/Move](#) [Add Logic](#)

Progress: ■■■■■■■■■■□□

Add Question Add Page

Edit Delete Copy/Move Add Logic

\* At what level of kidney function would you refer a patient with diabetic nephropathy to a nephrologist?

- As soon as the serum creatinine is abnormal
- GFR or CrCl less than 90 ml/min
- GFR or CrCl less than 60 ml/min
- GFR or CrCl less than 30 ml/min
- GFR or CrCl less than 15 ml/min
- as soon as microalbuminuria is present, regardless of creatinine clearance

Add Question Add Page

20. Survey9 Edit Page Delete Page Copy/Move Add Logic

Progress: ■■■■■■■■■■□□

Add Question Add Page

Edit Delete Copy/Move Add Logic

\* Your patient has chronic kidney disease and wants to start hemodialysis when the kidneys fail. In your opinion, at what level of glomerular filtration rate (GFR) or creatinine clearance (CrCl) should a vascular access (fistula) be placed?

- GFR or CrCl less than 50 ml/min
- GFR or CrCl less than 25 ml/min
- GFR or CrCl less than 15 ml/min
- After patient started dialysis
- I am not sure

Add Question Add Page

21. Survey10 Edit Page Delete Page Copy/Move Add Logic

Progress: ■■■■■■■■■■□

Add Question Add Page

Edit Delete Copy/Move

\* Your patient is a 37-year old Non-Hispanic Caucasian man with hypertension, microalbuminuria (40 mg/day), and a blood pressure of 145/95 mmHg. He is taking a thiazide diuretic. Would you add an angiotensin converting enzyme inhibitor if the patient's serum creatinine concentrations fell within one of the following ranges?

|               | Yes                   | No                    |
|---------------|-----------------------|-----------------------|
| 0.6-1.4 mg/dl | <input type="radio"/> | <input type="radio"/> |
| 1.5-2.0 mg/dl | <input type="radio"/> | <input type="radio"/> |
| 2.1-2.5 mg/dl | <input type="radio"/> | <input type="radio"/> |
| 2.6-3.0 mg/dl | <input type="radio"/> | <input type="radio"/> |

3.1-4.0 mg/dl

above 4.0 mg/dl

Add Question

Add Page

## 22. Survey11

Edit Page

Delete Page

Copy/Move

Add Logic

Progress: ■■■■■■■■■■□

Add Question

Add Page

Edit Delete Copy/Move

**\* Your patient is a 37-year old African American man with hypertension, microalbuminuria (40 mg/day), and a blood pressure of 145/95 mmHg. He is taking a thiazide diuretic. Would you add an angiotensin converting enzyme inhibitor if the patient's serum creatinine concentrations fell within one of the following ranges?**

Yes

No

0.6-1.4 mg/dl

1.5-2.0 mg/dl

2.1-2.5 mg/dl

2.6-3.0 mg/dl

3.1-4.0 mg/dl

above 4.0 mg/dl

Add Question

Add Page

## 23. All of your answers are recorded anonymously.

Edit Page

Delete Page

Copy/Move

Add Logic

Progress: ■■■■■■■■■■

Add Question

Add Page

Edit Delete Copy/Move

**Your age (not required)**

Add Question

Add Page

Edit Delete Copy/Move Add Logic

**Your gender (not required)**

Female

Male

Add Question

Add Page

Edit Delete Copy/Move Add Logic

**\* Level of training**

Student

Intern

Resident

Fellow

Attending

Add Question

Add Page

Edit Delete Copy/Move Add Logic

**\* Years in practice**

0-3                      4-6                      7-9                      10+

                                                                

Add Question Add Page

24. Thank you for participating in this survey. Please give us your feedback.

Edit Page Delete Page

Progress: ■■■■■■■■■■■■

Add Question Add Page

Edit Delete Copy/Move

**Please rate this survey**

|                                 | Strongly disagree     | Somewhat disagree     | Neutral               | Somewhat agree        | Strongly agree        |
|---------------------------------|-----------------------|-----------------------|-----------------------|-----------------------|-----------------------|
| Questions were clear            | <input type="radio"/> | <input type="radio"/> | <input type="radio"/> | <input type="radio"/> | <input type="radio"/> |
| Questions were relevant         | <input type="radio"/> | <input type="radio"/> | <input type="radio"/> | <input type="radio"/> | <input type="radio"/> |
| Length of survey was acceptable | <input type="radio"/> | <input type="radio"/> | <input type="radio"/> | <input type="radio"/> | <input type="radio"/> |

Add Question Add Page

Edit Delete Copy/Move

**Comments:**

Add Question Add Page

25. The end

Edit Page Delete Page Copy/Move Add Logic

Add Question Add Page

Edit Delete Copy/Move

**Thank you for participating in this survey.**

**For questions regarding this survey please contact:**

**Oliver Lenz, MD**  
**Division of Nephrology & Hypertension**  
**1600 NW 10th Ave Rm 7168**  
**Miami, FL 33136**

Add Question Add Page

<< Back

Preview

[SurveyMonkey is Hiring!](#) | [Privacy Statement](#) | [Contact Us](#) | [Logout](#)

Copyright ©1999-2006 SurveyMonkey.com. All Rights Reserved.  
No portion of this site may be copied without the express written consent of SurveyMonkey.com.
